# Supplementary material for: Reduced Autophagy by a microRNA-mediated Signaling Cascade in Diabetes-induced Renal Glomerular Hypertrophy
Source: PubMed Central journal article supplement (PMC5934412; doi:10.1038/s41598-018-25295-x), 2018-05-03
Supplement: 41598_2018_25295_MOESM1_ESM.pdf [file 41598_2018_25295_MOESM1_ESM.pdf]

**Reduced Autophagy by a microRNA-mediated Signaling Cascade in Diabetes-induced Renal Glomerular Hypertrophy**

**Supriya Deshpande, Maryam Abdollahi, Mei Wang, Linda Lanting, Mitsuo Kato and Rama Natarajan**

Department of Diabetes Complications and Metabolism, Diabetes Metabolism Research Institute and Beckman Research Institute of City of Hope, Duarte, California 91010, USA

***Correspondence to:***

Rama Natarajan, [rnatarajan@coh.org](mailto:rnatarajan@coh.org) or

Mitsuo Kato, [mkato@coh.org](mailto:mkato@coh.org)

**Department of Diabetes Complications and Metabolism**

**Diabetes & Metabolism Research Institute**

**Beckman Research Institute of the City of Hope**

**1500 East Duarte Road,**

Duarte, CA 91010

Tel: 626-218-2289, 626-218-3996

Fax: 626-301-8136

Fig.1E

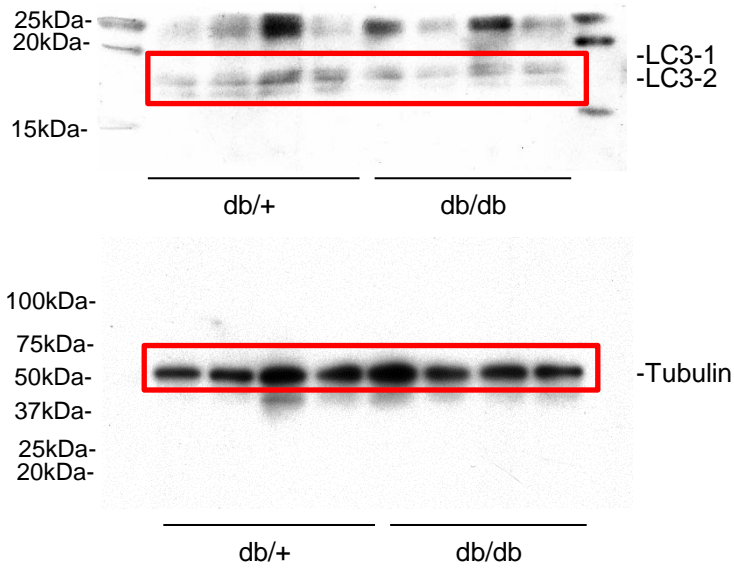

Fig.2D

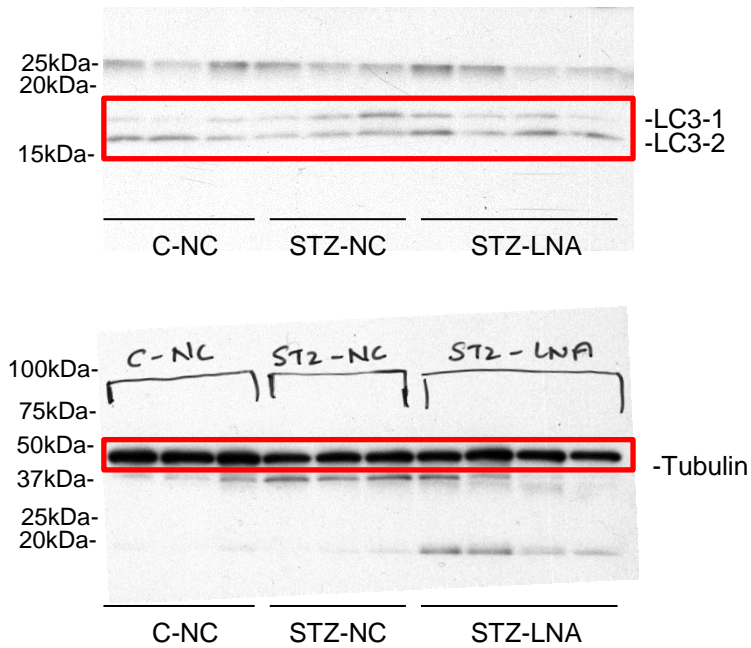

Supplementary Figure 1. Wider (uncropped) scans of blots (Fig.1E & Fig.3D).
